# Supplementary material for: Integrated multidisciplinary approach to hidradenitis suppurativa in clinical practice,,
Source: PubMed Central journal article supplement — Int J Womens Dermatol. 2020 Feb 22;6(3):164–8. doi: 10.1016/j.ijwd.2020.02.006 (PMC7330447; doi:10.1016/j.ijwd.2020.02.006), 2020-02-22
Supplement: mmc2.pdf [file mmc2.pdf]

| Table 1. Patient characteristics                                                                                                                                                                                                          |                    |                  |
|-------------------------------------------------------------------------------------------------------------------------------------------------------------------------------------------------------------------------------------------|--------------------|------------------|
|                                                                                                                                                                                                                                           |                    | Patients, n=49   |
| Male gender                                                                                                                                                                                                                               |                    | 24 (49)          |
| Age (years)                                                                                                                                                                                                                               |                    | 34 (11.7)        |
| Age at onset                                                                                                                                                                                                                              |                    | 23.2 (11.3)      |
| Delay in diagnosis (years)                                                                                                                                                                                                                |                    | 3.94 (4.3) n=35  |
| Patients referred for the first time                                                                                                                                                                                                      |                    | 38 (77.5)        |
| <b>Previous surgical management:</b>                                                                                                                                                                                                      |                    |                  |
| Abscess drainage                                                                                                                                                                                                                          |                    | 28 (57.1)        |
| Excision of individual lesions                                                                                                                                                                                                            |                    | 15 (26.5)        |
| Total excision                                                                                                                                                                                                                            |                    | 8 (30.6)         |
| <b>Previous medical management <sup>1</sup>:</b>                                                                                                                                                                                          |                    |                  |
| Systemic antibiotics <sup>2</sup>                                                                                                                                                                                                         |                    | 14 (32.5)        |
| Number of previous antibiotic regimens                                                                                                                                                                                                    |                    | 1.2 (1) n=43     |
| Family history of HS                                                                                                                                                                                                                      |                    | 16 (34) n=47     |
| Number of anatomical sites involved <sup>3</sup>                                                                                                                                                                                          |                    | 4.4              |
| HS phenotype <sup>4,5</sup>                                                                                                                                                                                                               | - axillary-mammary | 24 (48.9)        |
|                                                                                                                                                                                                                                           | - follicular       | 13 (26.5)        |
|                                                                                                                                                                                                                                           | - gluteal          | 11 (22.4)        |
| Hurley                                                                                                                                                                                                                                    | -stage 1           | 11 (22.4)        |
|                                                                                                                                                                                                                                           | -stage 2           | 29 (59.1)        |
|                                                                                                                                                                                                                                           | -stage 3           | 9 (18.3)         |
| Intermittent course                                                                                                                                                                                                                       |                    | 24 (53.3) n=45   |
| Continuous course                                                                                                                                                                                                                         |                    | 21 (46.6) n=45   |
| Modified Sartorius score                                                                                                                                                                                                                  |                    | 30.4 (17.6) n=45 |
| Number of fistulas                                                                                                                                                                                                                        |                    | 1.2 (2.6) n=42   |
| Number of abscesses and inflammatory nodules                                                                                                                                                                                              |                    | 4.3 (4.4) n=45   |
| DLQI                                                                                                                                                                                                                                      |                    | 13.4 (7.6) n=39  |
| Data are expressed as mean (SD) and n (%) for continuous and categorical variables, respectively.                                                                                                                                         |                    |                  |
| 1. Adalimumab is not reimbursed In France and thus its prescription is very limited.                                                                                                                                                      |                    |                  |
| 2. Induction treatment.                                                                                                                                                                                                                   |                    |                  |
| 3. The following areas were considered: axillary, mammary, gluteal, inter-gluteal cleft, inguinal.                                                                                                                                        |                    |                  |
| 4. According to Canoui-Poitrine F, Le Thuaut A, Revuz J et al. Identification of three Hidradentitis suppurativa Phenotypes: latent class analysis of a cross-sectional study. <i>J Invest Dermatol</i> 2013 Jun; <b>133</b> (6):1506-11. |                    |                  |
| 5. One patient was diagnosed with PAPASH syndrome.                                                                                                                                                                                        |                    |                  |
